# Supplementary material
Source: PubMed Central journal article supplement (PMC1805519)
Supplement: pnas_0611724104_2.pdf [file pnas_0611724104_2.pdf]

# Liver

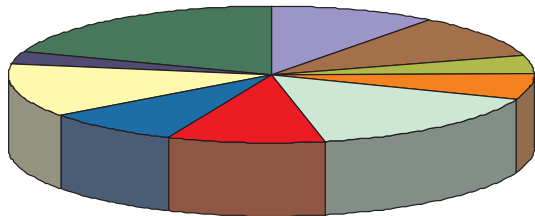

# Muscle

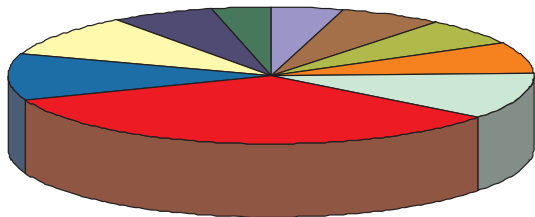

- CELL RESPONSE
- CELL-CELL SIGNALING
- SIGNAL TRANSDUCTION
- CELL ORGANIZATION
- TRANSCRIPTION
- METABOLISM
- PROTEIN DEGRADATION
- PROLIFERATION
- STRESS RESPONSE
- DIFFERENTIATION
